# Supplementary material
Source: publisher figshare collection journal article supplement (https://aacr.figshare.com/articles/dataset/_/23814432)
Supplement: Supplementary file 1 [file 41783433]

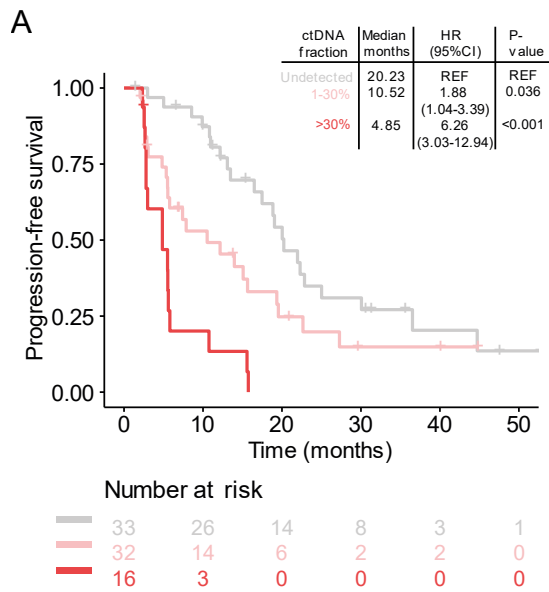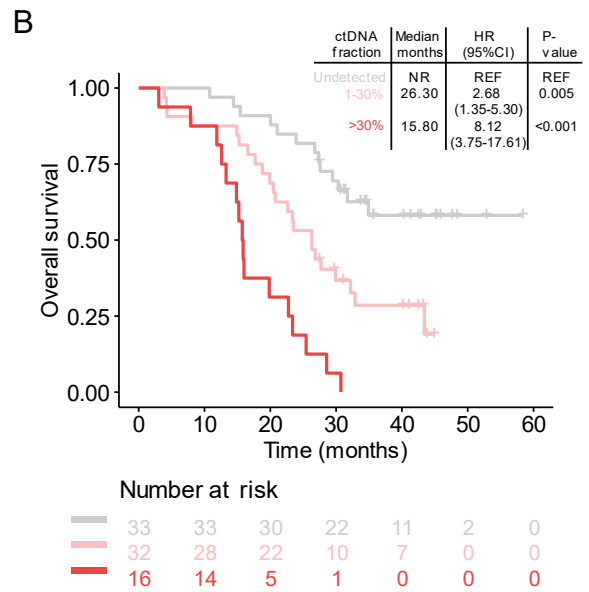

**Supplementary Figure S5.** Relationship between baseline circulating tumor DNA fraction and patient outcomes. Progression-free survival (PFS; **A**) and overall survival (OS; **B**) for patients with high (>30%), intermediate (1-30%) or low (undetected; <1%) circulating tumor DNA (ctDNA) at baseline.
